# Supplementary material for: Behavior-driven forecasts of neighborhood-level COVID-19 spread in New York City
Source: bioRxiv or medRxiv preprint supplement (doi:10.1101/2024.04.17.24305995), 2025-03-20
Supplement: Supplementary file [file media-1.pdf]

## Supplementary Text

### Defining place categories

To examine whether the same type of POIs shared similar visitation and contact patterns, we performed a clustering analysis of POIs based on three metrics: (1) crowdedness, (2) dwell time, and (3) variance of visitor numbers within a week. We first classified all POIs into subgroups using the first four digits of the NAICS code. For each subgroup, we calculated the mean values of all three metrics using data from January 2020 to February 2020 (prior to the pandemic). We normalized each metric by dividing the maximum value across all subgroups so that the three metrics are on the same scale. A Gaussian mixture clustering was performed. We identified three clusters (Fig. S1). Interestingly, subgroups of POIs within the same broader categories were generally clustered within the same cluster. Based on this preliminary analysis, we classified all POIs into five place categories using the first four digits of NAICS codes. The classification rule is provided in Table S1.

### Retrospective forecasts

We used the EAKF to generate retrospective forecasts. The EAKF assumes a Gaussian distribution of both the prior and likelihood and adjusts the prior distribution to a posterior using Bayes' rule deterministically. To represent the state-space distribution, the EAKF maintains an ensemble of system state vectors acting as samples from the distribution. In particular, the EAKF assumes that both the prior distribution and likelihood are Gaussian, and thus can be fully characterized by their first two moments (mean and variance). The update scheme for ensemble members is computed using Bayes' rule (posterior  $\propto$  prior  $\times$  likelihood) via the convolution of the two Gaussian distributions. For observed state variables, the posterior of the  $i$ th ensemble member is updated through

$$y_{t,post}^i = \frac{\sigma_{t,obs}^2}{\sigma_{t,obs}^2 + \sigma_{t,prior}^2} \bar{y}_{t,prior} + \frac{\sigma_{t,prior}^2}{\sigma_{t,obs}^2 + \sigma_{t,prior}^2} y_t^o + \sqrt{\frac{\sigma_{t,obs}^2}{\sigma_{t,obs}^2 + \sigma_{t,prior}^2}} (y_{t,prior}^i - \bar{y}_{t,prior}). \quad [S1]$$

Here  $y_{t,post}^i$  and  $y_{t,prior}^i$  are the posterior and prior of the observed variable for the  $i$ th ensemble member at time  $t$ ;  $\bar{y}_{t,prior}$  is the mean of the prior observed variable;  $\sigma_{t,obs}^2$  and  $\sigma_{t,prior}^2$  are the variances of the observation and the prior observed variable; and  $y_t^o$  is the observation at time  $t$ . Unobserved variables and parameters are updated through their covariability with the observed variable, which can be computed directly from the ensemble. In particular, the  $i$ th ensemble member of unobserved variable or parameter  $x^i$  is updated by

$$x_{t,post}^i = x_{t,prior}^i + \frac{\sigma(\{x_{t,prior}\}_n, \{y_{t,prior}\}_n)}{\sigma_{t,prior}^2} (y_{t,post}^i - y_{t,prior}^i). \quad [S2]$$

Here  $x_{t,post}^i$  and  $x_{t,prior}^i$  are the posterior and prior of the unobserved variable or parameter for the  $i$ th ensemble member at time  $t$ ; and  $\sigma(\{x_{t,prior}\}_n, \{y_{t,prior}\}_n)$  is the covariance between the prior of the unobserved variable or parameter  $\{x_{t,prior}\}_n$  and the prior of the observed variable

$\{y_{t,prior}\}_n$  at time  $t$ . In the EAKF, variables and parameters are updated deterministically such that the higher moments of the prior distribution are preserved in the posterior.

In the EAKF, we assumed a heuristic form of observation error variance (OEV):  $\sigma_{lt}^2 = \sigma_{l0}^2 + (y_{lt}^o)^2/9$ , where  $\sigma_{l0}^2$  is the baseline OEV for neighborhood  $l$  and  $y_{lt}^o$  is the observed case in neighborhood  $l$  in week  $t$ . To account for heterogeneous disease burdens across neighborhoods, the baseline OEV  $\sigma_{l0}^2$  was defined as 2500 (i.e., standard deviation 50). We chose a relatively large OEV to avoid ensemble degeneracy. Similar forms of OEV have been successfully used for inference and forecasting for a range of infectious diseases. During the weekly EAKF update, we looped through observations in all neighborhoods. The observation in neighborhood  $l$  was used to update model variables within the same neighborhood and global parameters ( $v_p$  for five place categories and  $\beta_h$  for household transmission). In implementation, we used 500 ensemble members.

A pseudo-code for the EAKF is provided below.

---

Algorithm 1. EAKF

---

**Input:** The transmission model  $\mathcal{M}$ , observations  $\{y_{lt}^o\}$  in  $T$  weeks and  $L$  locations, the observational error variance (OEV)  $\{\sigma_{lt}^2\}$ , the initial ensemble of system state  $\{z_i^0\}$  with 500 ensemble members.

**for**  $t = 1$  to  $T$  **do**

Run model  $\mathcal{M}$  forward for one time step using system state  $\{z_i^{t-1}\}$ , obtain the ensemble of prior observed variables and system states at time  $t$ :  $[\{y_{lt,prior}\}, \{z_{i,prior}^t\}] = \mathcal{M}(\{z_i^{t-1}\})$

**for**  $l = 1$  to  $L$  **do**

Update observed variable in location  $l$  at time  $t$  using Eq. S1:

$$\{y_{lt,post}\} = EAKF(\{y_{lt,prior}\}, y_{lt}^o, \sigma_{lt}^2).$$

Update unobserved variables in location  $l$  at time  $t$  and parameters using Eq. S2:

$$\{z_{i,post}^t\} = EAKF(\{z_{i,prior}^t\}, \{y_{lt,prior}\}, \{y_{lt,post}\}).$$

**end for**

Update the ensemble of model state at time  $t$  using the posterior:  $\{z_i^t\} \leftarrow \{z_{i,post}^t\}$ , which will be used to initiate the model at the next time step.

Run the transmission model  $\mathcal{M}$  forward using current posterior state to generate forecasts.

**end for**

---

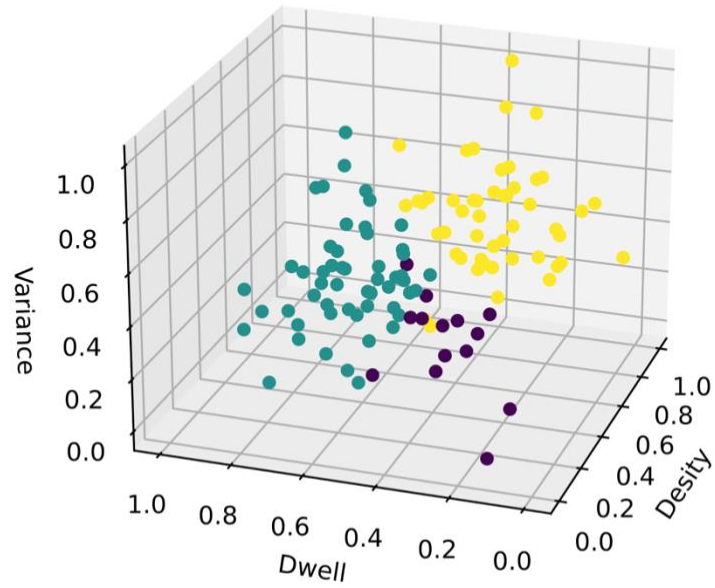

**Fig. S1.**

Clustering of POIs using crowdedness, dwell time, and variance of visitor numbers within a week. Each data point represents one subgroup of POIs with the same first four digits of the NAICS code. The three clusters identified by the Gaussian mixture model are highlighted in different colors.

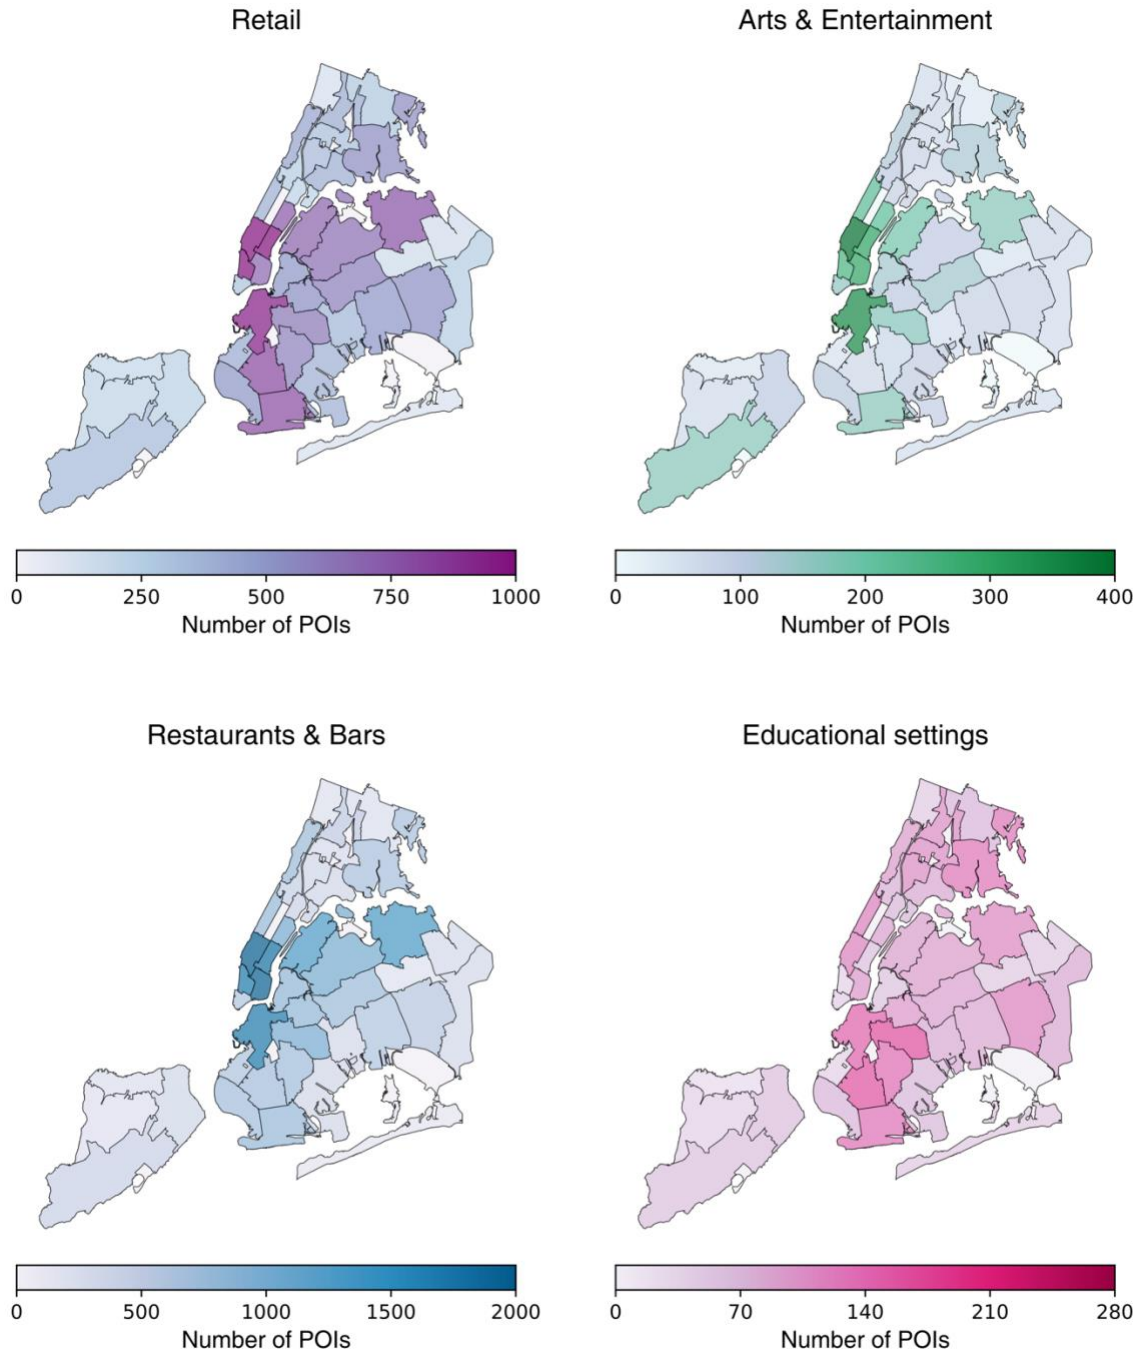

**Fig. S2.**

Geographical distribution of POIs. We visualize the number of POIs in each neighborhood for retail, arts & entertainment, restaurants & bars, and educational settings.

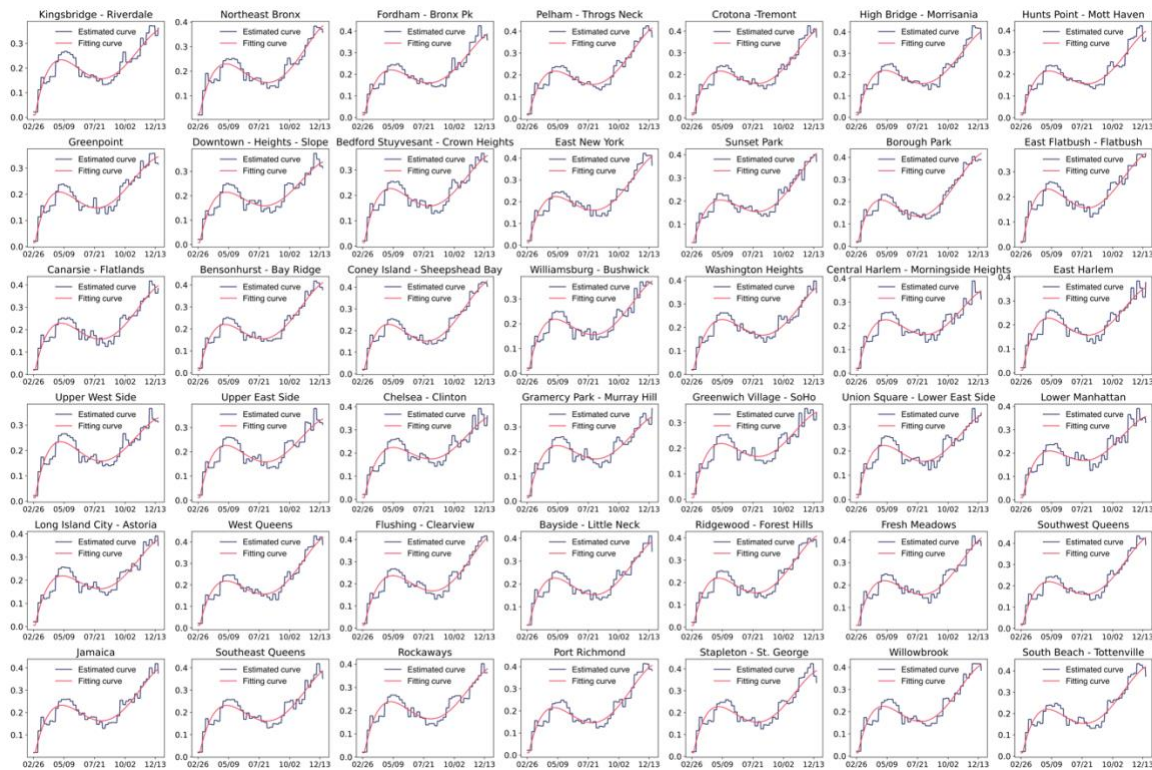

**Fig. S3.**

Weekly ascertainment rates in each neighborhood. The black lines are the estimated weekly ascertainment rate in Yang et al 2022 (36). We fit a smooth curve using a fourth-order polynomial function (red lines) for each neighborhood and used the smoothed curve to set ascertainment rates in our model.

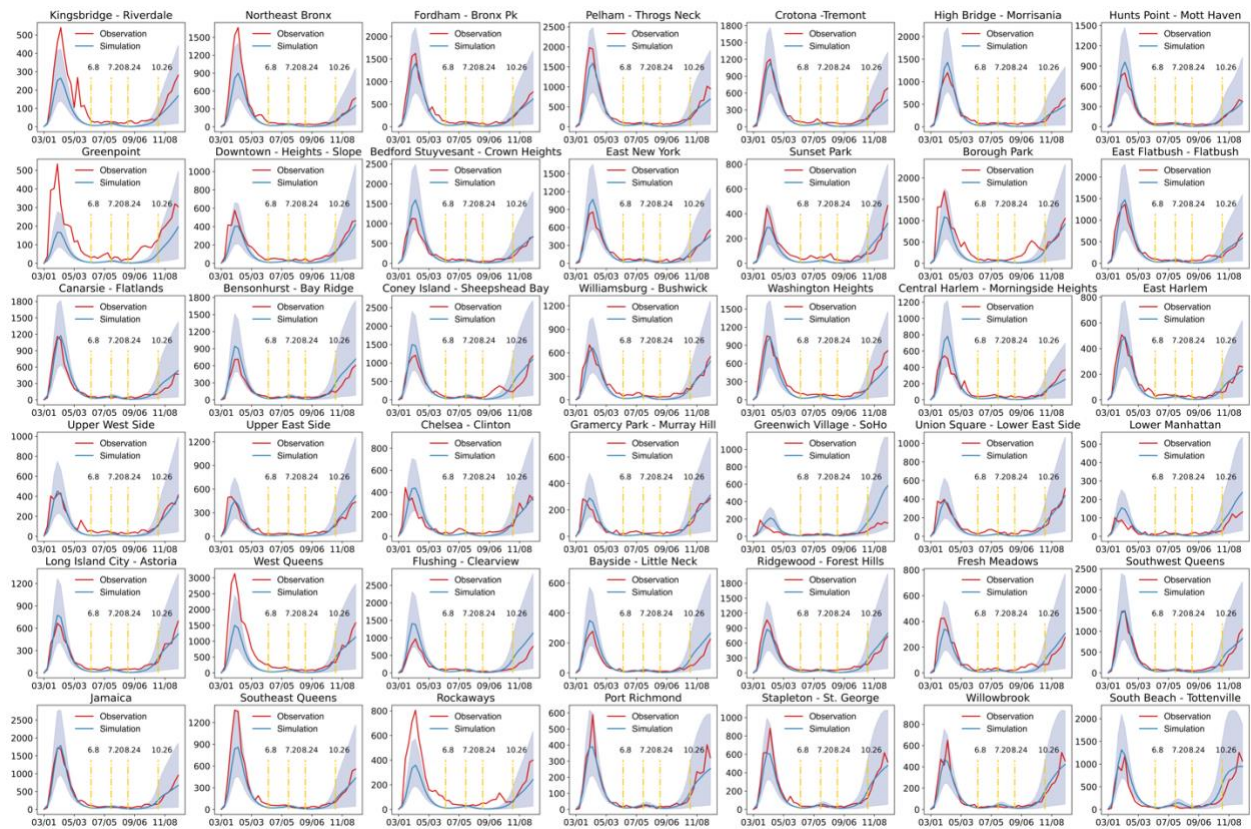

**Fig. S4.**

Model fitting in 42 NYC neighborhoods. Model simulations using estimated posterior parameters (blue) are compared with the reported weekly cases in each neighborhood. The blue shaded areas show 95% CIs, obtained from 500 simulations.

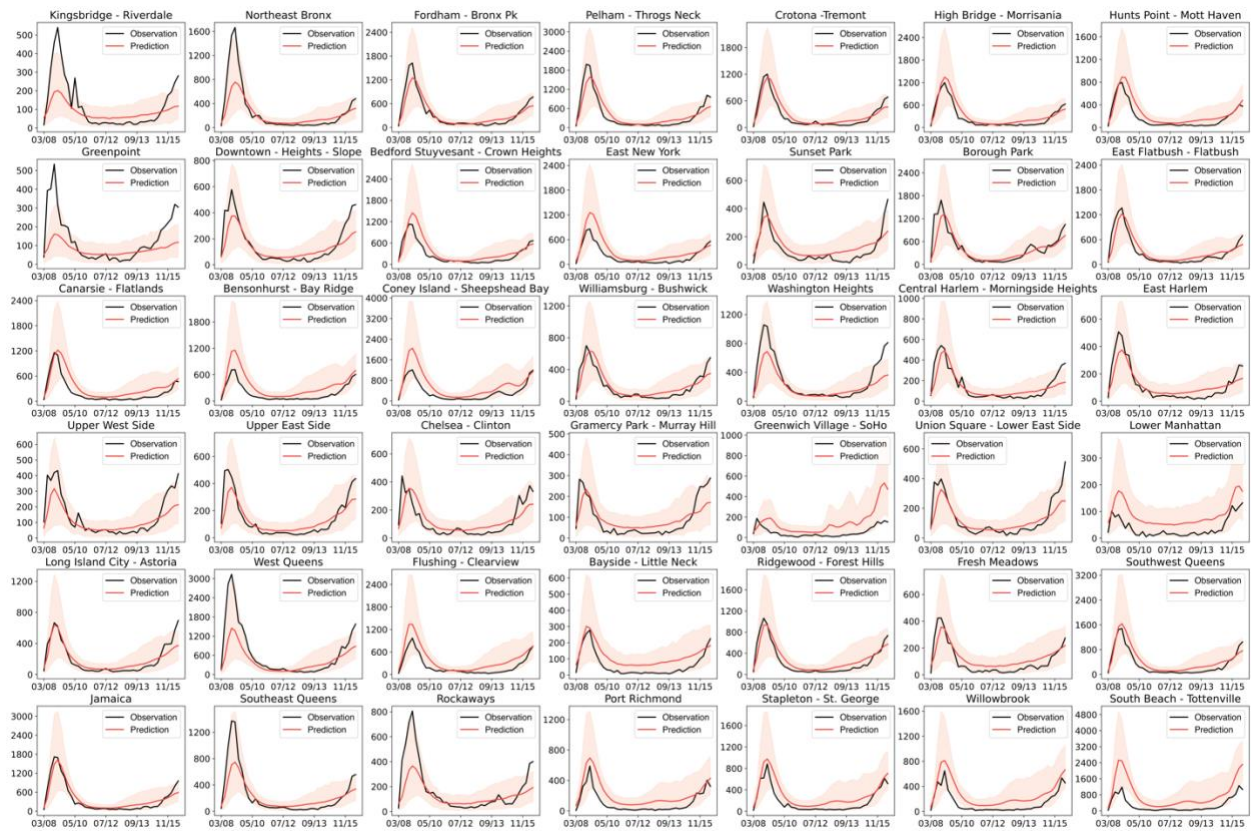

**Fig. S5.**

One-week ahead forecasts using the behavior-driven epidemic model. Shaded areas are 95% CIs obtained from 500 ensemble members.

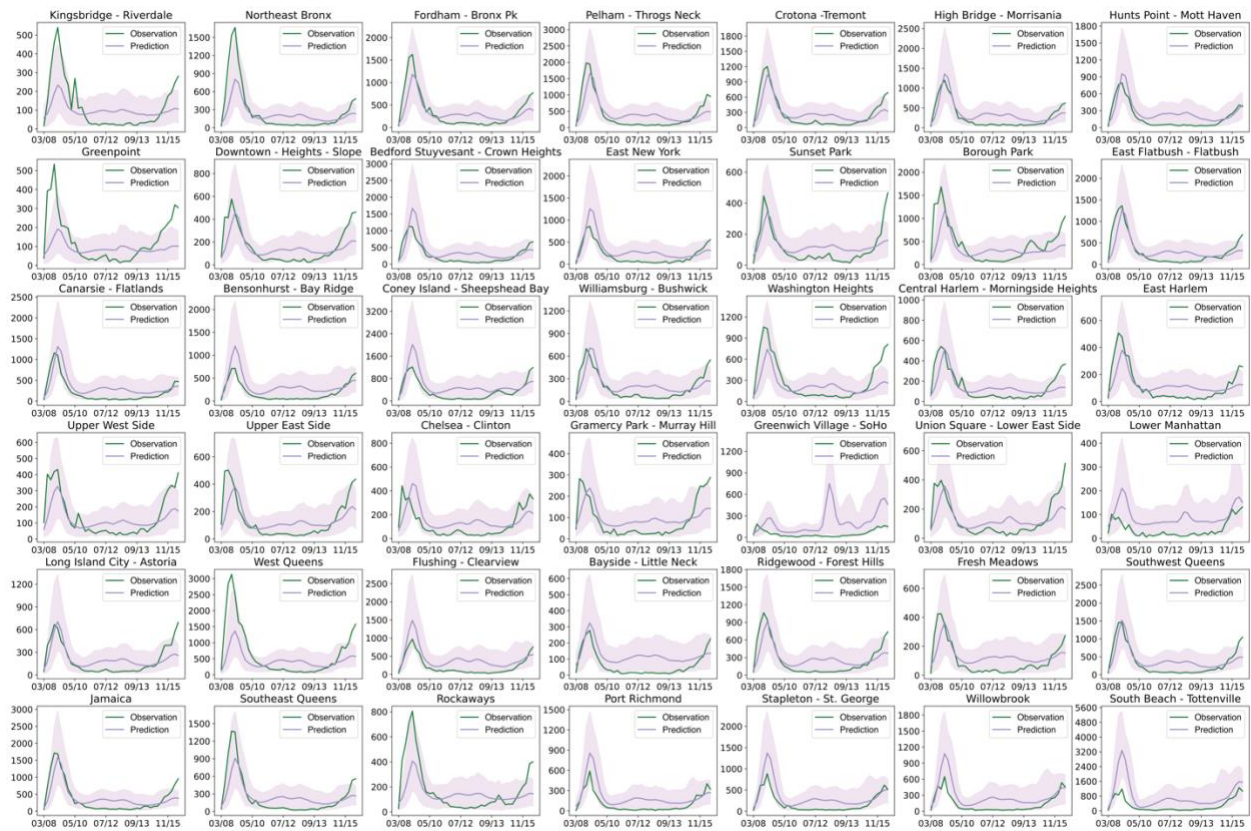

**Fig. S6.**

One-week ahead forecasts using the baseline model. Shaded areas are 95% CIs obtained from 500 ensemble members.



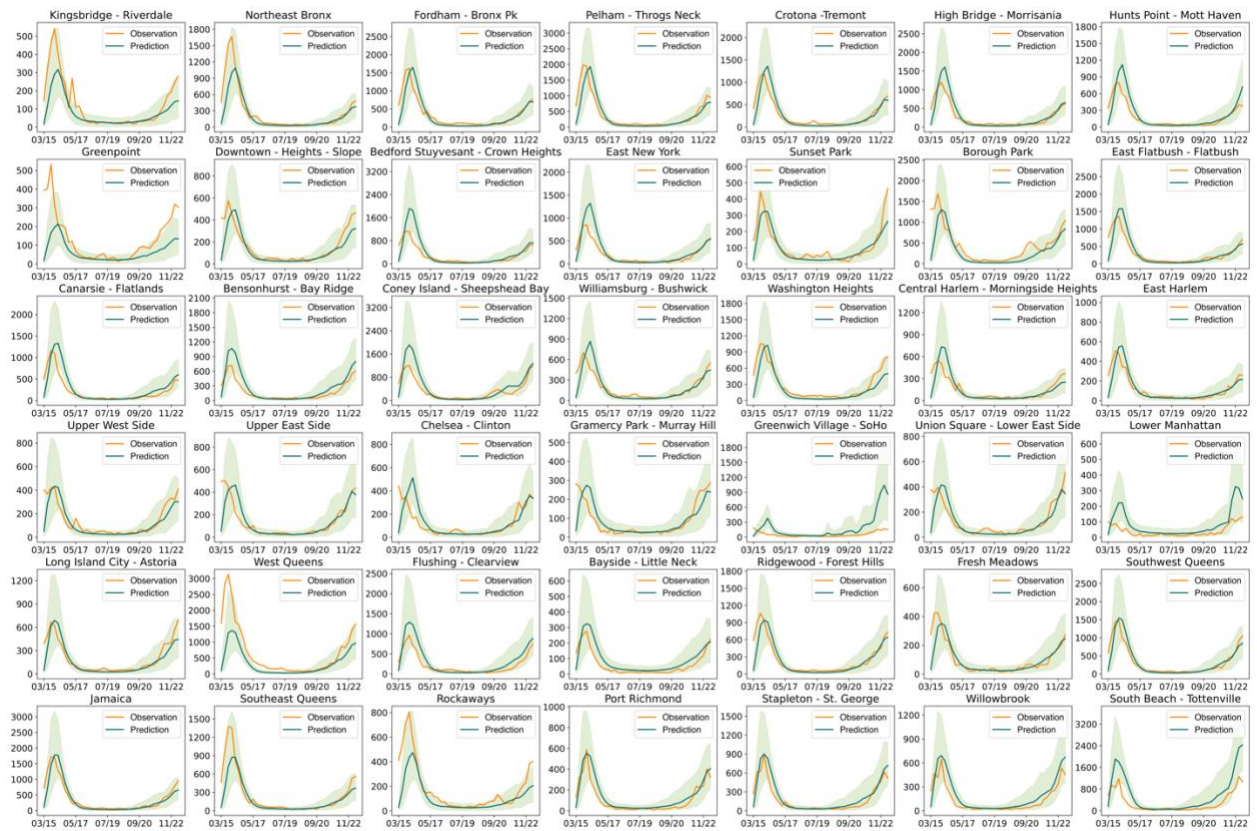

**Fig. S7.**

Two-week ahead forecasts using the behavior-driven epidemic model. Shaded areas are 95% CIs obtained from 500 ensemble members.

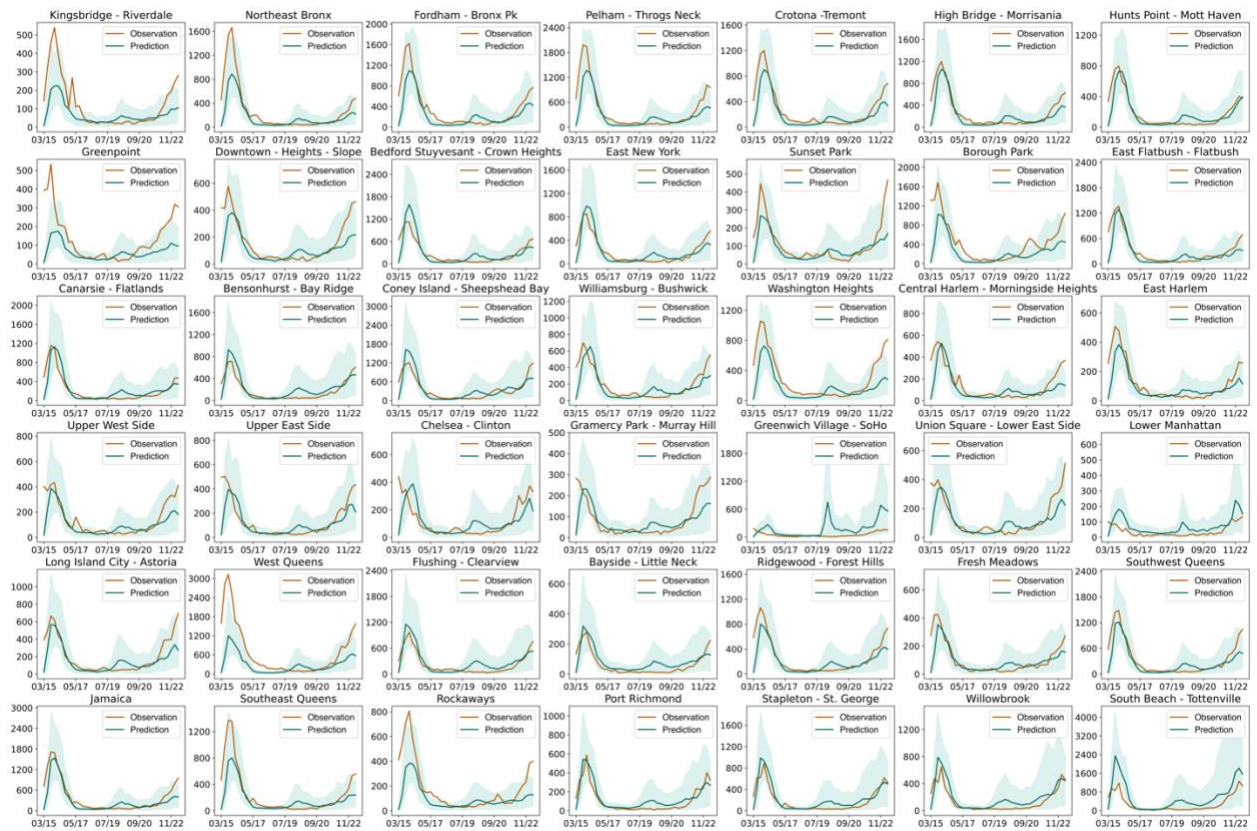

**Fig. S8.**

Two-week ahead forecasts using the baseline model. Shaded areas are 95% CIs obtained from 500 ensemble members.

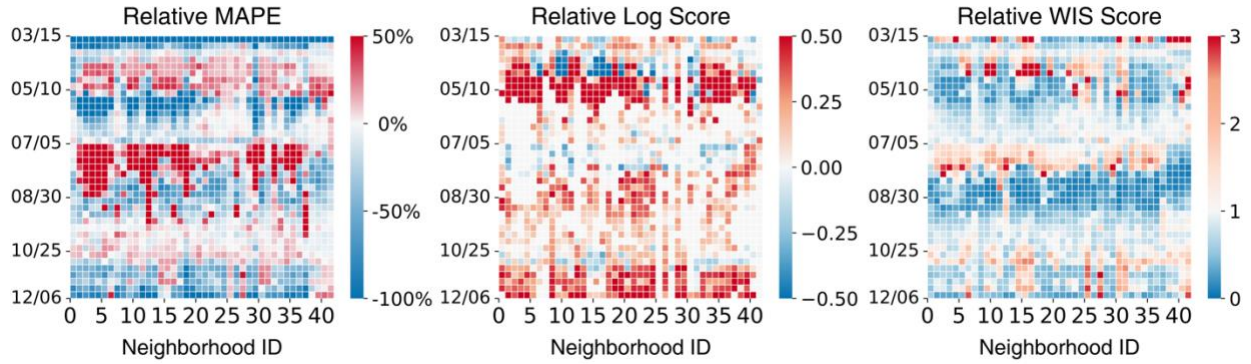

**Fig. S9.**

Comparison of two-week ahead forecasts. Comparison with a baseline model that does not incorporate mobility and contact patterns in place categories. From left to right, we present the relative mean absolute percentage error (MAPE) (MAPEs of the proposed model minus those of the baseline, with blue indicating better forecasts), relative log score (log scores of the proposed model minus those of the baseline, with red indicating better forecasts), and relative weighted interval score (WIS) (the ratio of the WIS scores of the proposed model to those of the baseline, with blue indicating better forecasts) for all 42 neighborhoods from March 8, 2020 to December 13, 2020.

**Table S1.**

Classification of POIs using the NAICS codes.

| <b>Place category</b> | <b>NAICS code and description</b>                            |                                                                                        |
|-----------------------|--------------------------------------------------------------|----------------------------------------------------------------------------------------|
| Restaurants & bars    | 7223                                                         | <a href="#">Special Food Services</a>                                                  |
|                       | 7224                                                         | <a href="#">Drinking Places (Alcoholic Beverages)</a>                                  |
|                       | 7225                                                         | <a href="#">Restaurants and Other Eating Places</a>                                    |
| Arts & entertainment  | 7111                                                         | <a href="#">Performing Arts Companies</a>                                              |
|                       | 7113                                                         | <a href="#">Promoters of Performing Arts, Sports, and Similar Events</a>               |
|                       | 7131                                                         | <a href="#">Amusement Parks and Arcades</a>                                            |
|                       | 7139                                                         | <a href="#">Other Amusement and Recreation Industries</a>                              |
|                       | 7112                                                         | <a href="#">Spectator Sports</a>                                                       |
|                       | 7121                                                         | <a href="#">Museums, Historical Sites, and Similar Institutions</a>                    |
|                       | 7132                                                         | <a href="#">Gambling Industries</a>                                                    |
| Educational settings  | 6111                                                         | <a href="#">Elementary and Secondary Schools</a>                                       |
|                       | 6112                                                         | <a href="#">Junior Colleges</a>                                                        |
|                       | 6113                                                         | <a href="#">Colleges, Universities, and Professional Schools</a>                       |
|                       | 6115                                                         | <a href="#">Technical and Trade Schools</a>                                            |
|                       | 6116                                                         | <a href="#">Other Schools and Instruction</a>                                          |
| Retail                | 4411                                                         | <a href="#">Automobile Dealers</a>                                                     |
|                       | 4412                                                         | <a href="#">Other Motor Vehicle Dealers</a>                                            |
|                       | 4413                                                         | <a href="#">Automotive Parts, Accessories, and Tire Stores</a>                         |
|                       | 4421                                                         | <a href="#">Furniture Stores</a>                                                       |
|                       | 4422                                                         | <a href="#">Home Furnishings Stores</a>                                                |
|                       | 4431                                                         | <a href="#">Electronics and Appliance Stores</a>                                       |
|                       | 4441                                                         | <a href="#">Building Material and Supplies Dealers</a>                                 |
|                       | 4442                                                         | <a href="#">Lawn and Garden Equipment and Supplies Stores</a>                          |
|                       | 4451                                                         | <a href="#">Grocery Stores</a>                                                         |
|                       | 4452                                                         | <a href="#">Specialty Food Stores</a>                                                  |
|                       | 4453                                                         | <a href="#">Beer, Wine, and Liquor Stores</a>                                          |
|                       | 4461                                                         | <a href="#">Health and Personal Care Stores</a>                                        |
|                       | 4471                                                         | <a href="#">Gasoline Stations</a>                                                      |
|                       | 4481                                                         | <a href="#">Clothing Stores</a>                                                        |
|                       | 4482                                                         | <a href="#">Shoe Stores</a>                                                            |
|                       | 4483                                                         | <a href="#">Jewelry, Luggage, and Leather Goods Stores</a>                             |
|                       | 4511                                                         | <a href="#">Sporting Goods, Hobby, and Musical Instrument Stores</a>                   |
|                       | 4512                                                         | <a href="#">Book Stores and News Dealers</a>                                           |
|                       | 4522                                                         | <a href="#">Department Stores</a>                                                      |
|                       | 4523                                                         | <a href="#">General Merchandise Stores, including Warehouse Clubs and Supercenters</a> |
| 4531                  | <a href="#">Florists</a>                                     |                                                                                        |
| 4532                  | <a href="#">Office Supplies, Stationery, and Gift Stores</a> |                                                                                        |
| 4533                  | <a href="#">Used Merchandise Stores</a>                      |                                                                                        |
| 4539                  | <a href="#">Other Miscellaneous Store Retailers</a>          |                                                                                        |
| Other places          | Other NAICS codes                                            |                                                                                        |

**Table S2.**

Major policy changes in NYC in 2020.

| Date       | Policy                                                                                                                                                                                                                                                                                                                                                                                                                                                                                                                                                        | Source                                                                                                                                                                                                                                                                                                                                                                                                                                                                                                     |
|------------|---------------------------------------------------------------------------------------------------------------------------------------------------------------------------------------------------------------------------------------------------------------------------------------------------------------------------------------------------------------------------------------------------------------------------------------------------------------------------------------------------------------------------------------------------------------|------------------------------------------------------------------------------------------------------------------------------------------------------------------------------------------------------------------------------------------------------------------------------------------------------------------------------------------------------------------------------------------------------------------------------------------------------------------------------------------------------------|
| March 13   | Mayor Bill de Blasio issued a state of emergency. In partnership with the State, the City will place occupancy and spatial limits on New York City’s large venues and cancel all existing and future events exceeding a capacity of over 500 people until further notice, with restrictions put in place on establishments with a capacity under 500 people. The City has also set a target benchmark of getting 10 percent (roughly 35,000 people) of the City’s workforce to telecommute and 20 percent (roughly 71,000 people) on staggered work schedules | <a href="https://www.nyc.gov/office-of-the-mayor/news/138-20/mayor-de-blasio-issues-state-emergency">https://www.nyc.gov/office-of-the-mayor/news/138-20/mayor-de-blasio-issues-state-emergency</a>                                                                                                                                                                                                                                                                                                        |
| June 8     | NYC begins Phase 1 reopening. New York City is now eligible to resume elective surgeries and ambulatory care. Restaurants and bars have been allowed to offer takeout and delivery throughout the pandemic. Outdoor businesses like drive-in movies, landscaping and gardening are allowed to resume. Nonessential retail stores, for delivery, curbside and in-store pickup are allowed to resume. Employees of construction jobs, wholesale, manufacturing, agriculture and retail companies can go back to work.                                           | <a href="https://www.governor.ny.gov/news/new-york-city-enters-phase-one-reopening-today-governor-cuomo-announces-new-york-city-now">https://www.governor.ny.gov/news/new-york-city-enters-phase-one-reopening-today-governor-cuomo-announces-new-york-city-now</a>                                                                                                                                                                                                                                        |
| July 20    | NYC begins Phase 4 reopening on July 19. Zoos, botanical gardens, historical sites, outdoor museums, and parks are allowed to reopen. Movie theaters, concert venues, amusement parks remain closed.                                                                                                                                                                                                                                                                                                                                                          | <a href="https://www.timeout.com/new-york/news/whats-next-after-phase-4-what-you-need-to-know-about-nycs-reopening-072220">https://www.timeout.com/new-york/news/whats-next-after-phase-4-what-you-need-to-know-about-nycs-reopening-072220</a>                                                                                                                                                                                                                                                            |
| August 24  | Gyms and Fitness Centers Can Reopen Starting August 24. Museums, aquariums and other low-risk indoor cultural institutions were allowed to reopen.                                                                                                                                                                                                                                                                                                                                                                                                            | <a href="https://www.governor.ny.gov/news/governor-cuomo-announces-gyms-and-fitness-centers-can-reopen-starting-august-24">https://www.governor.ny.gov/news/governor-cuomo-announces-gyms-and-fitness-centers-can-reopen-starting-august-24</a><br><a href="https://www.nbcnewyork.com/news/local/cuomo-nyc-museums-can-reopen-later-this-month-bowling-alleys-on-monday/2568000">https://www.nbcnewyork.com/news/local/cuomo-nyc-museums-can-reopen-later-this-month-bowling-alleys-on-monday/2568000</a> |
| October 21 | New York “Micro-Cluster” Strategy started.                                                                                                                                                                                                                                                                                                                                                                                                                                                                                                                    | <a href="https://www.governor.ny.gov/sites/default/files/atoms/files/MicroCluster_Metrics_10.21.20_FINAL.pdf">https://www.governor.ny.gov/sites/default/files/atoms/files/MicroCluster_Metrics_10.21.20_FINAL.pdf</a>                                                                                                                                                                                                                                                                                      |

**Table S3.**

Posterior parameters estimated in the best-fitting model in the grid search and model selection of parameters  $a$  and  $b$ . We show the mean estimates and the 95% CIs from MCMC samples.

| <b>Category</b>      | <b>Estimate</b> | <b>95% CI</b>   |
|----------------------|-----------------|-----------------|
| Retail               | 1.85            | (0.07-6.16)     |
| Arts & Entertainment | 0.63            | (0.02-2.20)     |
| Restaurants & Bars   | 27.88           | (25.43-30.09)   |
| Educational settings | 17.48           | (7.04-26.90)    |
| Other places         | 21.21           | (15.21-26.84)   |
| $\beta_h$            | 0.0032          | (0.0001-0.0104) |

**Table S4.**

Geweke diagnostic for MCMC chain convergence. A z-score between  $(-1.96, 1.96)$  or a p-value larger than 0.05 indicates the convergence of MCMC chains.

| <b>Category</b>      | <b>Phase</b> | <b>Z-score</b> | <b>p-value</b> |
|----------------------|--------------|----------------|----------------|
| Retail               | P1           | -0.961         | 0.336          |
|                      | P2           | -0.243         | 0.808          |
|                      | P3           | -0.317         | 0.751          |
|                      | P4           | 1.146          | 0.252          |
|                      | P5           | 1.275          | 0.202          |
| Arts & Entertainment | P1           | 0.068          | 0.946          |
|                      | P2           | 0.123          | 0.902          |
|                      | P3           | -0.566         | 0.572          |
|                      | P4           | -0.396         | 0.692          |
|                      | P5           | -0.051         | 0.959          |
| Restaurants & Bars   | P1           | 2.107          | 0.035          |
|                      | P2           | -0.315         | 0.753          |
|                      | P3           | 1.278          | 0.201          |
|                      | P4           | 0.710          | 0.478          |
|                      | P5           | -1.705         | 0.088          |
| Educational settings | P1           | -0.863         | 0.388          |
|                      | P2           | -1.202         | 0.230          |
|                      | P3           | 0.286          | 0.775          |
|                      | P4           | 0.122          | 0.903          |
|                      | P5           | -1.328         | 0.184          |
| Other places         | P1           | -0.547         | 0.584          |
|                      | P2           | 0.976          | 0.329          |
|                      | P3           | -1.928         | 0.054          |
|                      | P4           | -0.037         | 0.971          |
|                      | P5           | -0.511         | 0.609          |
| $\beta_h$            | P1           | -1.077         | 0.281          |
|                      | P2           | 0.277          | 0.782          |
|                      | P3           | -0.832         | 0.405          |
|                      | P4           | -0.996         | 0.319          |
|                      | P5           | 1.628          | 0.104          |
